# Supplementary material
Source: publisher figshare collection journal article supplement (https://gsapubs.figshare.com/ndownloader/files/23297789)
Supplement: Supplementary file 1 [file 23297789]

## **GSA DATA REPOSITORY 2014285**

### **Carbon-forming reactions under a reducing atmosphere during seismic fault slip**

Kiyokazu Oohashi\*, Raehee Han, Takehiro Hirose, Toshihiko Shimamoto,  
Kentaro Omura, and Tatsuo Matsuda

\*Corresponding author, E-mail address: oohashik@earth.s.chiba-u.ac.jp

#### **Contents**

##### **1. Details of the experimental apparatuses and procedures**

Fig. DR1

##### **2. Details of the peak decomposition methods of Raman spectra**

##### **3. Supplementary data**

Table DR1

#### **References**

##### **1. Details of the Experimental Apparatus and Procedures**

We conducted high-velocity friction experiments using a rotary-shear, low- to high-velocity friction apparatus at Hiroshima University (HDR apparatus; Togo and Shimamoto, 2012) and a high-velocity friction apparatus at Kochi Institute for Core Sample Research/JAMSTEC (HVR apparatus; Shimamoto and Tsutsumi, 1994; Hirose and Shimamoto, 2005). Both apparatuses were equipped with a small specimen chamber/vessel to contain a gas around the sample (Fig. DR1). For the HDR apparatus, rubber O-rings were placed at the top and bottom of the acrylic chamber to prevent gas leakage and inflow of air. Before the experiments, we evacuated the chamber and recharged it with N<sub>2</sub> gas three times, and then charged it with a selected gas (N<sub>2</sub> or H<sub>2</sub>). We confirmed that the relative humidity in the vessel was less than 2%, the detection limit of the sensor, during the experiments. The measured torque supported by the O-rings was less than 0.05 Nm, corresponding to a shear stress of ~0.01 MPa. For the experiments with the HVR apparatus, the O-ring was removed from the pressure vessel to detect emitted CH<sub>4</sub> gas from the sliding surface, because CH<sub>4</sub> gas was also released from the dynamic O-ring as a result of abrasion during experiments. Therefore, CH<sub>4</sub> gas (as well as the other gases) diffused from the vessel into the chamber, meaning that we

were unable to determine the concentration of gas accurately in this study. However, we were able to examine whether CH<sub>4</sub> gas was generated from the sliding surface during shearing. We also sealed the specimen chamber in which the vessel and holder were placed (Fig DR1B) with an acrylic plate to keep the anoxic atmosphere around specimens during the experiments. We flowed N<sub>2</sub> gas through the vessel (and the chamber) for five minutes to remove air, and then charged the vessel with N<sub>2</sub> or H<sub>2</sub> gas before a run. The sealing of the acrylic plate was sufficient to constrain O<sub>2</sub> concentration in the vessel and chamber to less than 2% both before and during the experiment.

Because the slip rate increases from the center to the periphery of the cylindrical specimens, we used the equivalent slip rate,  $V_e$ , defined such that  $\tau V_e S$  gives the rate of total frictional work on a fault with area  $S$ , assuming a constant shear stress  $\tau$  over the fault surface (Shimamoto and Tsutsumi, 1994). For convenience, we refer to “equivalent slip rate” as simply “slip rate” or “velocity” in the main text.

Figure DR1. A: Photograph of the acrylic chamber and specimen holder of the HDR apparatus. The lower specimen is moved up to contact the simulated fault surface and then the chamber is pulled down to supply gas around the specimens. B: Photograph of the metal pressure vessel and specimen holder of the HVR apparatus, with diagrams showing the gas supply system and a gas chromatograph (see also figure S2 in Hirose et al., 2011). The vessel and holder were placed in the specimen chamber, which was also sealed with an acrylic plate (see appendix 1 in Sato et al., 2009).

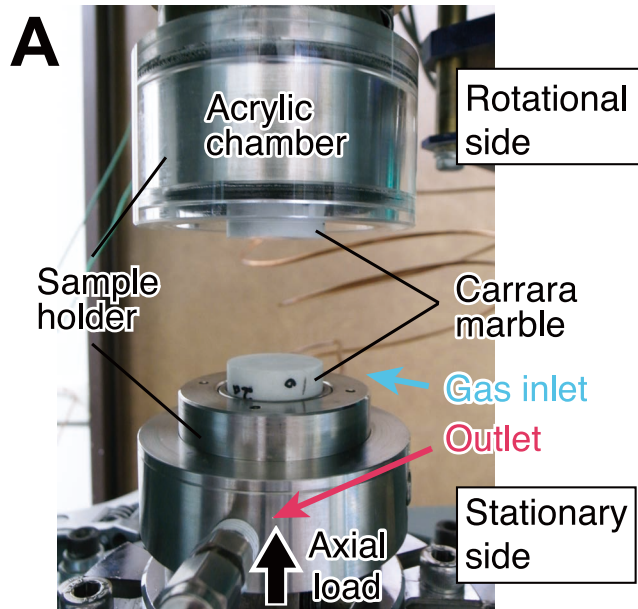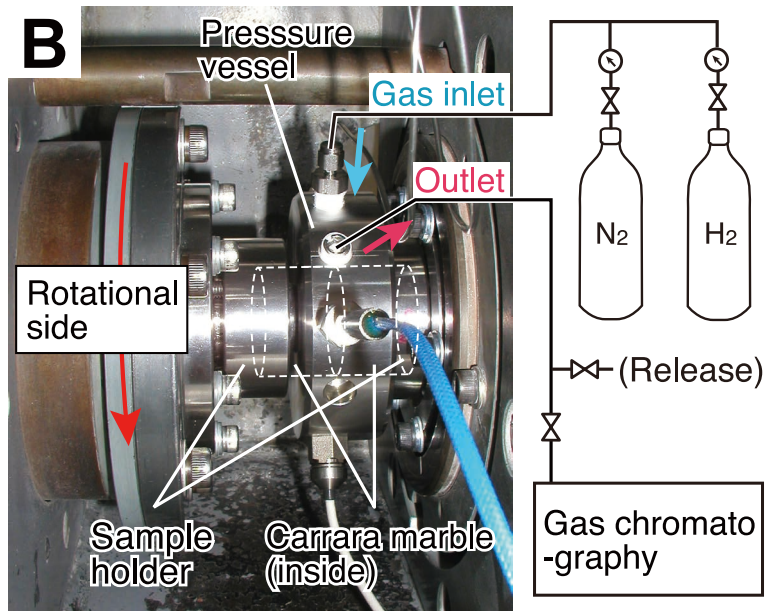

Figure DR1

## 2. Details of the Peak Decomposition Methods of Raman Spectra

We conducted peak decomposition of observed Raman spectra using the commercial software Igor Pro 6.22 (WaveMetrics Inc.) with Gaussian and Lorentzian functions. Because the spectra of the blackish gouge show characteristics of low-grade (amorphous-like) CM rather than those of high-grade (crystallized) CM, we used the peak decomposition method proposed by Kouketsu et al. (2013) for analyzing low-grade CM and obtained the results shown in the lower part of Figure 3B. Before the peak decomposition, the spectrum was corrected for the fluorescence background by subtracting a linear baseline in the spectral range of 900–1900  $\text{cm}^{-1}$ . The Raman spectra of intermediate- to high-grade CM usually contain G (graphite) band at  $\sim 1580 \text{ cm}^{-1}$ , associated with the  $E_{2g2}$  vibration mode of ideal graphitic lattice. However, the peak at around  $1600 \text{ cm}^{-1}$  could not be separated into D2 and G bands in all cases, and the latter is vanishingly small if it even exists. We therefore treat the peak at around  $1600 \text{ cm}^{-1}$  as a single peak (D2 band) in the present study.

## 3. Supplementary Data

Table DR1. Summary of experimental data reported in this paper. HDR or HVR in run numbers refers to the apparatus used in experiments. Slip-weakening parameters were determined for slip-weakening parts of the friction-displacement curves without including the data for subsequent slip strengthening, and hence  $\mu_{ss}$  values in some runs are not strictly the steady-state friction coefficient. Gas concentration is shown only for  $\text{CO}_2$ ,  $\text{H}_2$ , and  $\text{CH}_4$ . Symbols  $\mu_p$ : peak friction coefficient;  $\mu_{ss}$ : steady-state friction coefficient;  $D_c$ : slip-weakening displacement; SE: standard error. The  $\mu_{ss}$  values in brackets denote temporal steady-state friction before strengthening.

**Table DR1**

| Experiment number | Atmosphere     | Normal stress (MPa) | Displacement (m) | Duration (s) | $\mu_p$ | $\mu_{ss}$ |      | $D_c$ (m) |      | Gas chromatographic analysis (ppm) |                |                 | Formation of blackish material |
|-------------------|----------------|---------------------|------------------|--------------|---------|------------|------|-----------|------|------------------------------------|----------------|-----------------|--------------------------------|
|                   |                |                     |                  |              |         | Average    | SE   | Average   | SE   | CO <sub>2</sub>                    | H <sub>2</sub> | CH <sub>4</sub> |                                |
| HDR641            | H <sub>2</sub> | 2.0                 | 59.8             | 46.0         | 0.59    | 0.12       | 0.00 | 32.5      | 0.24 |                                    |                |                 | common                         |
| HDR642            | H <sub>2</sub> | 2.4                 | 97.9             | 75.3         | 0.77    | (0.09)     | 0.00 | 3.9       | 0.03 |                                    |                |                 | little                         |
| HDR677            | H <sub>2</sub> | 3.0                 | 105.5            | 81.1         | 0.31    | (0.03)     | 0.00 | 6.6       | 0.09 |                                    |                |                 | little                         |
| HDR678            | H <sub>2</sub> | 2.4                 | 79.4             | 61.1         | 0.82    | (0.12)     | 0.00 | 4.4       | 0.07 |                                    |                |                 | common                         |
| HDR679            | H <sub>2</sub> | 3.1                 | 71.5             | 92.8         | 0.37    | (0.11)     | 0.00 | 2.2       | 0.03 |                                    |                |                 | none                           |
| HVR2590           | H <sub>2</sub> | 3.1                 | 49.5             | 39.5         | 0.74    | 0.03       | 0.00 | 18.6      | 0.20 | 687                                | 7197           | none            | common                         |
| HVR2591           | H <sub>2</sub> | 3.1                 | 49.8             | 38.3         | 0.61    | 0.06       | 0.00 | 26.8      | 0.13 | 65666                              | 3921           | 133             | little                         |
| HVR2593           | H <sub>2</sub> | 3.1                 | 60.1             | 46.7         | 0.75    | 0.08       | 0.00 | 15.5      | 0.08 | 634                                | 53190          | none            | common                         |
| HDR676            | N <sub>2</sub> | 3.0                 | 94.0             | 72.3         | 0.25    | 0.11       | 0.00 | 7.4       | 0.23 |                                    |                |                 | none                           |
| HVR2592           | N <sub>2</sub> | 3.1                 | 87.3             | 67.1         | 0.76    | 0.15       | 0.00 | 1.4       | 0.04 |                                    |                |                 | none                           |
| HDR675            | Air            | 3.0                 | 50.3             | 38.7         | 0.89    | 0.08       | 0.00 | 37.1      | 0.43 |                                    |                |                 | none                           |

## References

- Hirose, T., Kawagucci, S., and Suzuki, K., 2011, Mechanoradical H<sub>2</sub> generation during simulated faulting: Implications for an earthquake-driven subsurface biosphere: *Geophysical Research Letters*, 38, L17303, doi:10.1029/2011GL048850.
- Hirose, T., and Shimamoto, T., 2005, Growth of molten zone as a mechanism of slip weakening of simulated faults in gabbro during frictional melting: *Journal of Geophysical Research*, 110, B05202, doi:10.1029/2004JB003207.
- Kouketsu, Y., Mizukami, T., Mori, H., Endo, S., Aoya, M., Hara, H., Nakamura, D., and Wallis, S., 2013, A new approach to develop the Raman carbonaceous material geothermometer for low-grade metamorphism using peak width: *The Island Arc*, doi:10.1111/iar.12057.
- Sato, K., Kumagai, H., Hirose, T., Tamura, H., Mizoguchi, K., Shimamoto, T., 2009, Experimental study for noble gas release and exchange under high-speed frictional melting: *Chemical Geology*, 266, p. 96–103 doi:10.1016/j.chemgeo.2008.12.017.
- Shimamoto, T., and Tsutsumi, A., 1994, A new rotary-shear high-velocity friction testing machine: Its basic design and scope of research: *Structural Geology*, 39, p. 65–78 (in Japanese with English abstract).
- Togo, T., and Shimamoto, T., 2012, Energy partition for grain crushing in quartz gouge during subseismic to seismic fault motion: an experimental study: *Journal of Structural Geology*, 38, 139–155.
